# Supplementary material for: FORTE 2.0: a fast, parallel and flexible coupled climate model
Source: Copernicus journal article supplement (doi:10.5194/gmd-14-275-2021), 2021-01-19
Supplement: Supplementary file 1 [file gmd-14-275-2021-supplement.zip]

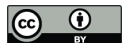

## *Supplement of*

# **FORTE 2.0: a fast, parallel and flexible coupled climate model**

**Adam T. Blaker et al.**

*Correspondence to:* Adam T. Blaker (atb299@noc.ac.uk)

- gmd-14-275-2021-supplement-title-page.pdf
- Figure\_files\_GMD\_R1.tar.gz
- \_\_MACOSX
  - .\_Figure\_files\_GMD\_R1.tar.gz

The copyright of individual parts of the supplement might differ from the CC BY 4.0 License.
